# Supplementary material
Source: HighWire-hosted journal article supplement (doi:10.1101/rna.078777.121)
Supplement: Supplemental_Material.docx [file Supplemental_Material.docx]

**Supplementary Materials**

**The m6A landscape of polyadenylated nuclear (PAN) RNA and its related methylome in the context of KSHV replication.**

Sarah Elizabeth Martin1, Huachen Gan1, Gabriela Toomer1, Nikitha Sridhar1, and Joanna Sztuba-Solinska1,*

1Department of Biological Sciences, Auburn University, 120 W. Samford Ave, Rouse Life Sciences Building, Auburn, AL 36849, United States

*To whom correspondence should be addressed. tel: 334-844-1650; email: jzs0165@auburn.edu

**
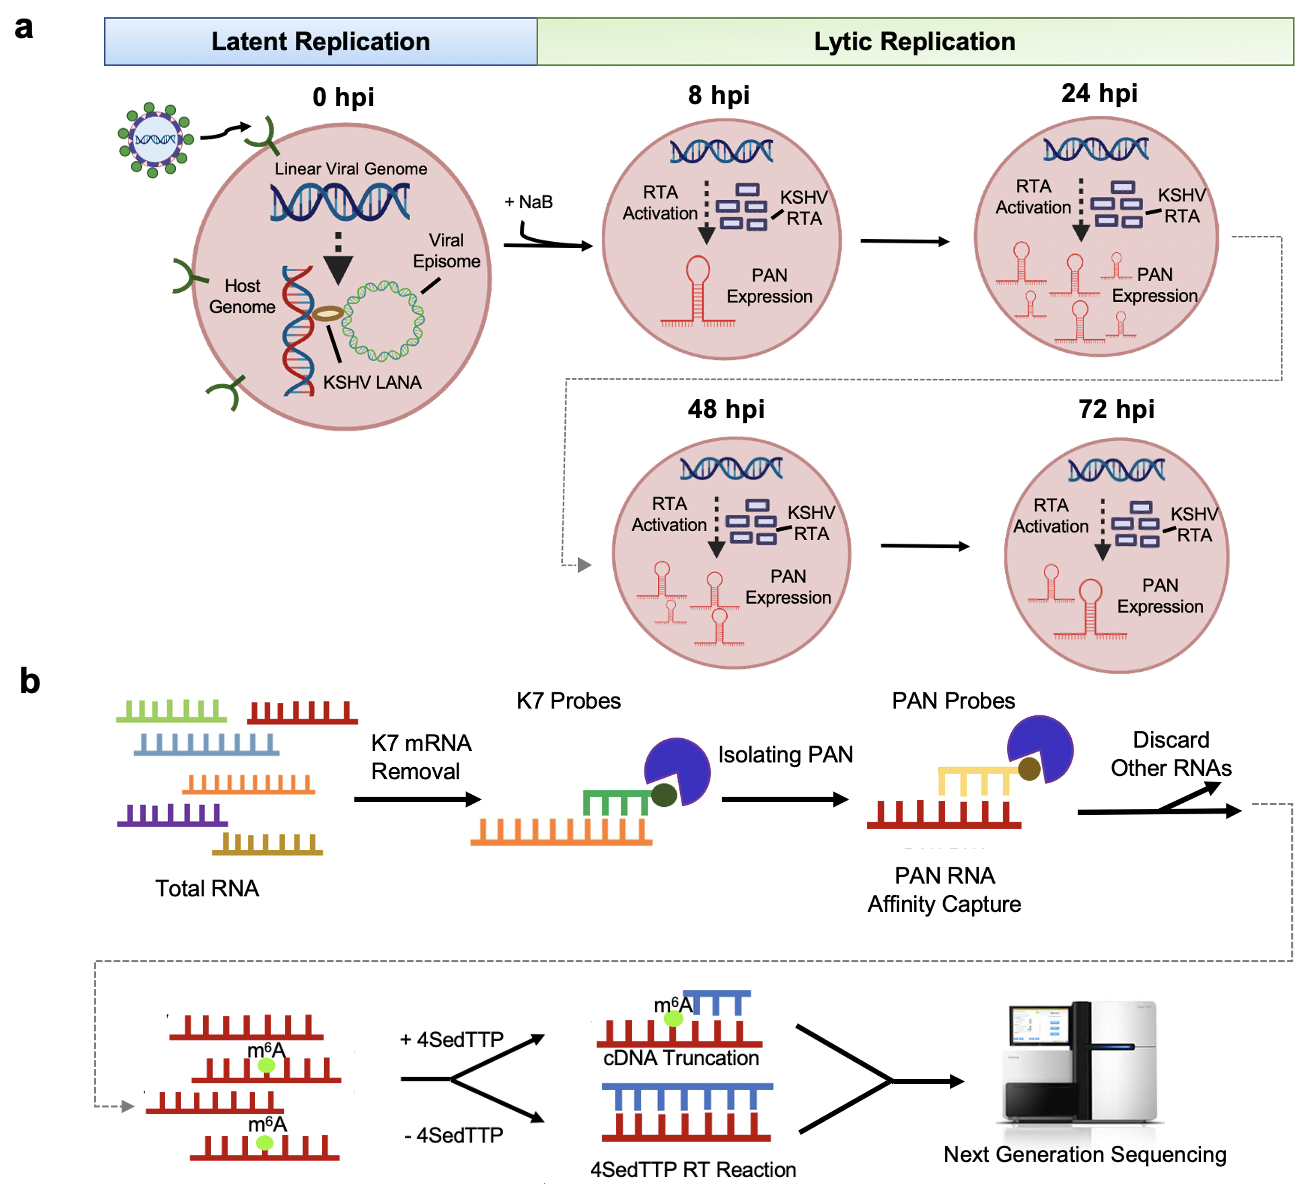
Supplementary Fig. 1 a,** **The KSHV infectivity cycle**. Latent (uninduced, 0 h pi) and lytic stages of KSHV infectivity cycle are indicated. Lytic cycle is further divided into the following stages: immediate early (8 h post induction, h pi), early (24 h pi), and late lytic (48 h pi and 72 h pi) based on distinct gene expression panel. PAN RNA expression is the most abundant at early lytic stage of KSHV infection (24 h pi). **b,** The schematic overview of 4SedTTP RT and next-generation sequencing methodology. Total RNA was subjected to the K7 mRNA depletion with a K7-specific biotinylated antisense probe (green). Fractions depleted of K7 mRNA were then subjected to the affinity capture of PAN with specific biotinylated antisense probes (yellow). Captured PAN RNA (red) was reverse transcribed in the presence of 4SedTTP to induce RT stops at m6A (bright green). The 4SedTTP RT experimental and control reactions were subjected to library preparation and next-generation sequencing.

**
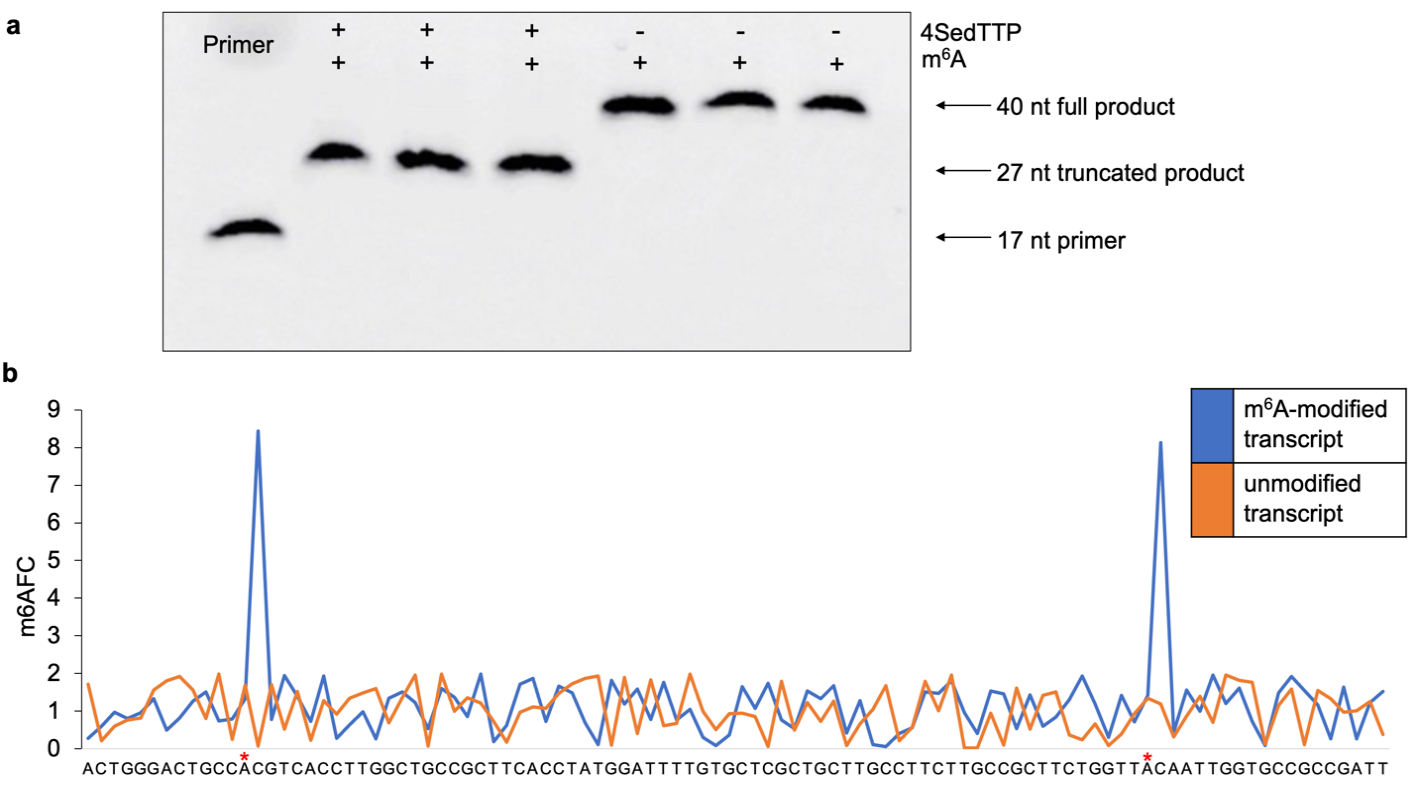
**

**Supplementary Fig. 2** **4SedTTP RT strategy for detection of m6A. a**, The electropherogram representing the results of initial assessment of 4SedTTP RT strategy. Fluorescent primer (17 nt) and in vitro transcript (40 nt) carrying one m6A residue were used in the RT reaction in the presence of either 4SedTTP (+) or dTTP (-). The presence of 4SedTTP in RT reactions induced the truncation of cDNA products (27 nt) as compared to the full-length cDNA product (40 nt). **b**, The plot represents the next-generation sequencing analysis performed on in vitro synthesized transcripts carrying m6A at positions 13 and 82 (blue), and another unmodified transcript. The X-axis represents nucleotide sequence, the Y-axis indicates m6A fold change values (m6AFC).

**
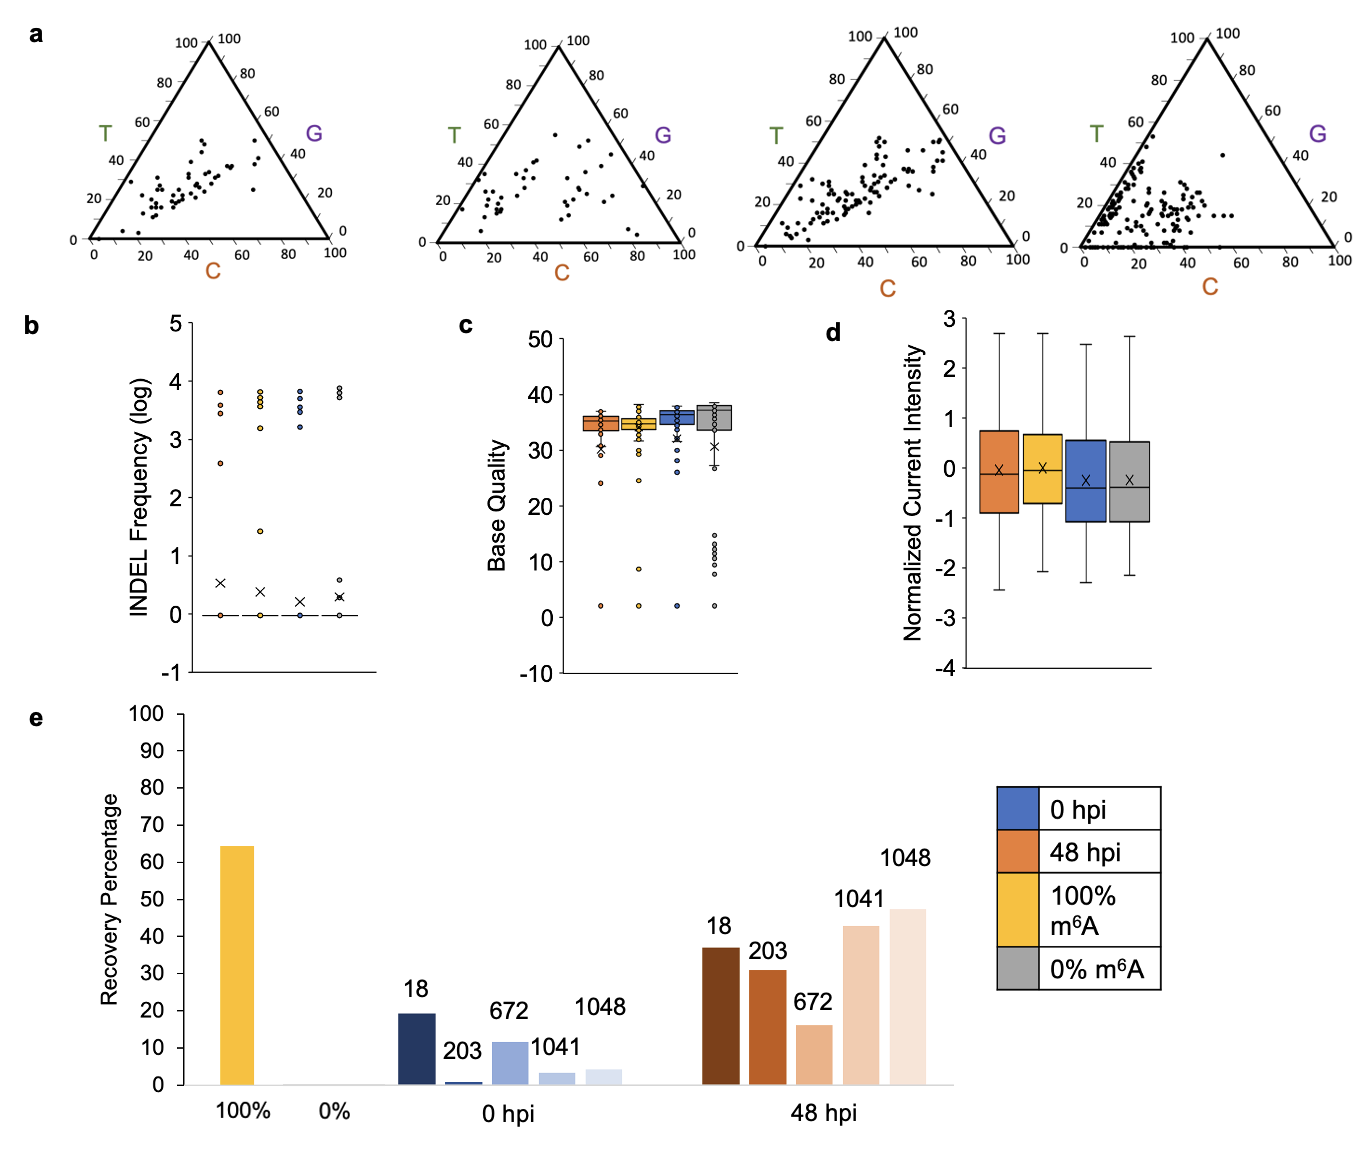
**

**Supplementary Fig. 3 Direct PAN RNA sequencing analysis. a**,Ternary diagrams depicting the mismatch directionality for m6A residues in (from left to right) 0% modified, 100% modified control transcripts and PAN RNA expressed during uninduced (0 h pi) and lytic (48 h pi) stages of KSHV infection. The scale on triangle sides reflects base proportions. **b**, Total insertions and deletions (INDEL), **c**, base-quality (BQ), **d**, normalized current intensity values assessed for PAN RNA expressed during uninduced (blue) and lytic (orange) stages of KSHV infection and contrasted with values obtained for 100% modified (yellow) and unmodified transcripts (gray). **e**, Predicted stoichiometry of m6A at specified sites performed using k-nearest neighbors (KNN) algorithm that classifies reads as modified or non-modified. X-axis represents all adenosines in 100% and 0% modified control PAN transcripts, and specific modified adenosines on PAN RNA expressed during uninduced (0 h pi, blue), and lytic stages of KSHV replication (48 h pi, orange). Y-axis represents m6A recovery percentage.


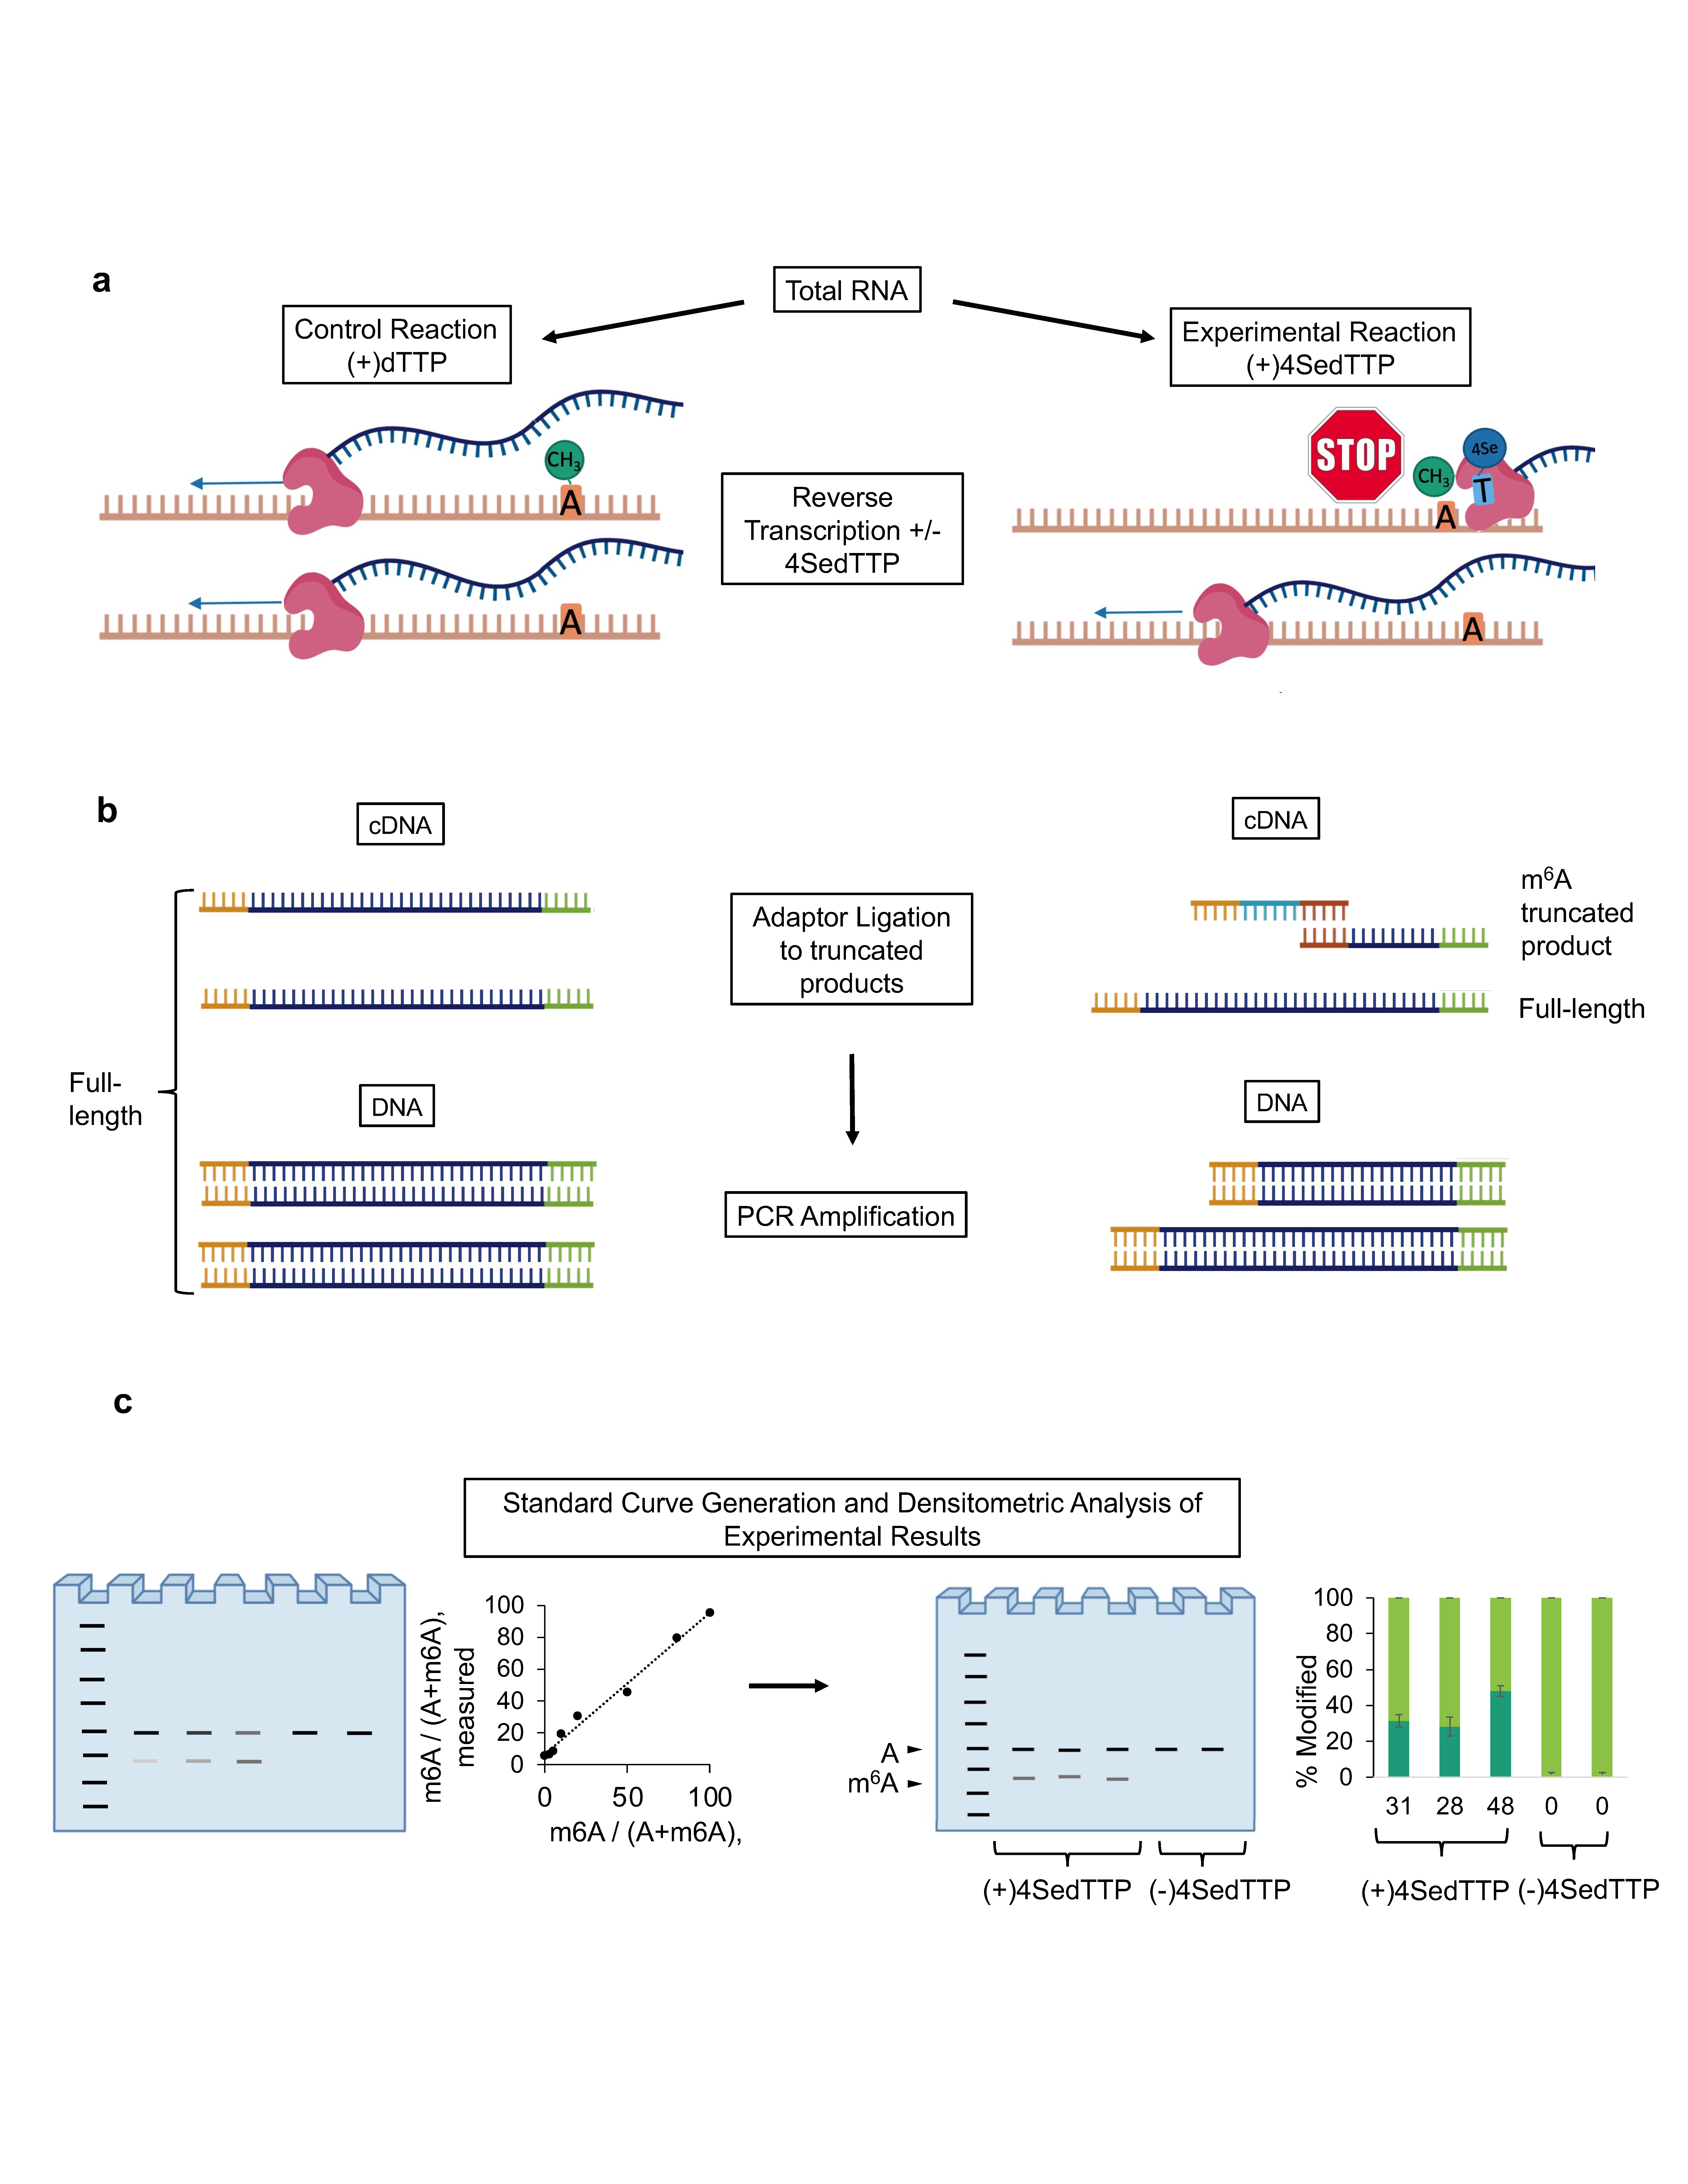


**Supplementary Figure 4. The schematic overview of SLAP method**. **a,** Total RNA is reverse transcribed in the presence (experimental reaction) or absence (control reaction) of selenium-modified deoxythymidine triphosphate (4SedTTP) that invokes reverse transcriptase (RT) stops 1 nts downstream of m6A. **b**, Oligonucleotide adapter that introduces a common binding site for a forward primer is site-specifically ligated to truncated m6A-specific products and full-length products that correspond to unmodified site. Next, that forward primer and reverse primer that binds downstream sequence present on both modified and unmodified products, are used to generate two distinct products corresponding to the modified and unmodified site in the same sample during single PCR reaction. **c**, The obtained products are separated during polyacrylamide gel electrophoresis and quantified by densitometry measurements. The comparison of the obtained densitometry values to the calibration curve yields the information about the modification frequency at each analyzed site.

**
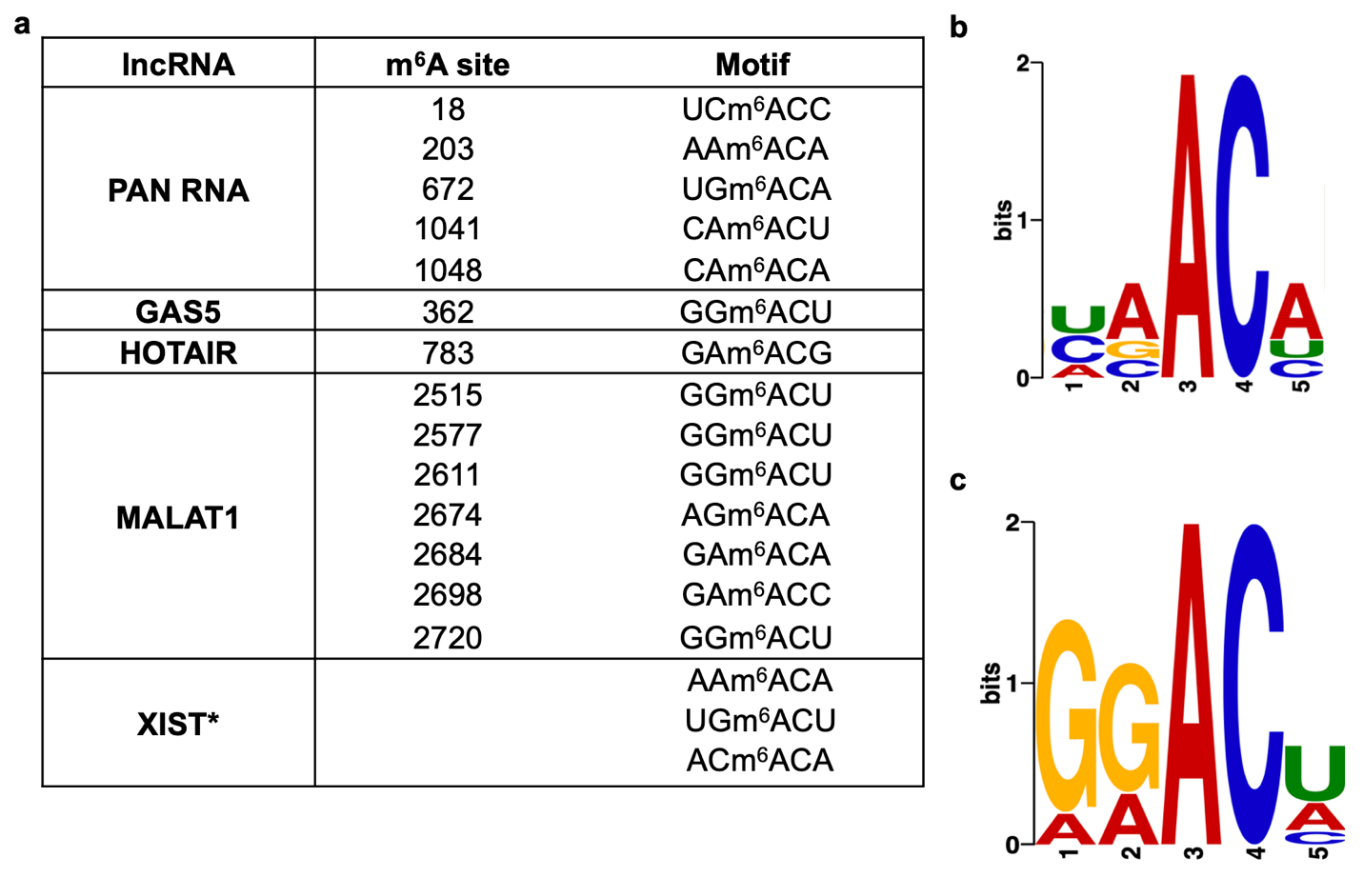
**

**Supplementary Fig. 5 The m6A consensus on PAN RNA. a**, The list of sequences carrying m6A within PAN and selected cellular lncRNAs, i.e., Growth Arrest Specific 5 (GAS5, Ni et al., 2019), HOX antisense intergenic RNA (HOTAIR, Porman et al., 2020), Metastasis Associated Lung Adenocarcinoma Transcript 1 (MALAT1, Zhou et al., 2016; Wang et al., 2021), and X-inactive specific transcript (XIST, Patil et al., 2016). **b**, MEME analysis of PAN RNA m6A signatures. **c**, MEME analysis of the m6A sequence environment in cellular lncRNAs.

**
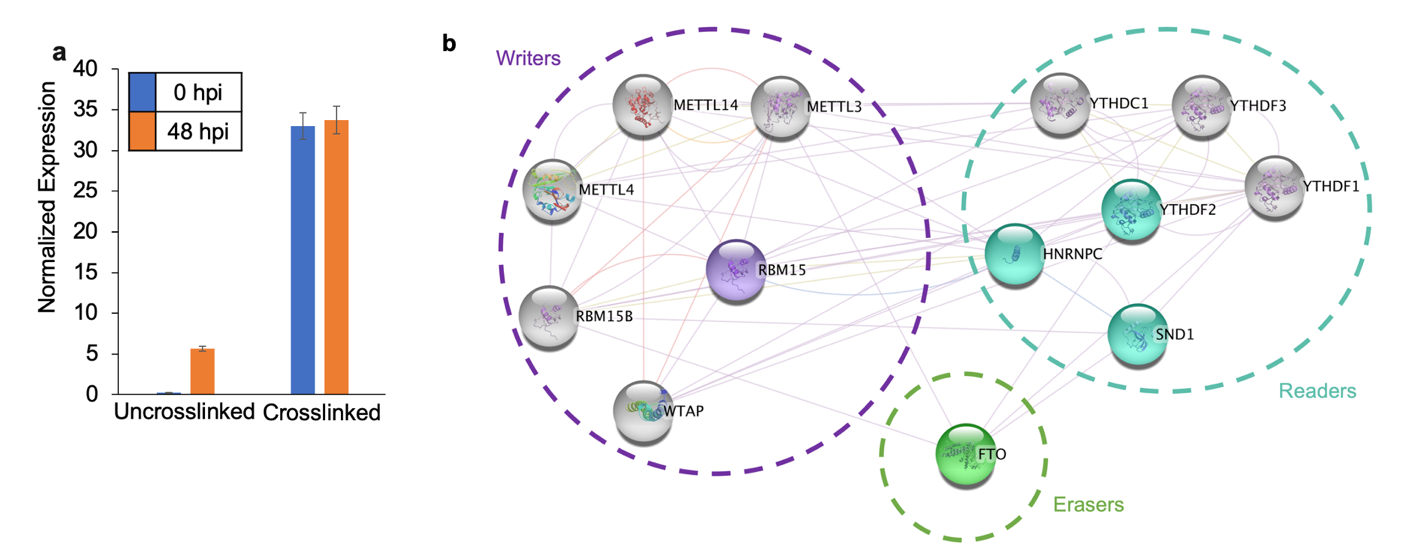
**

**Supplemental Fig. 6 The RAP MS analysis for PAN RNA m6A methylome. a**, Normalized expression of PAN RNA assessed by RT qPCR of total RNA samples extracted during KSHV latent (0 hpi) and lytic (48 hpi) stages of replication, both with and without PAN RNA-protein crosslinking and affinity capture. **b**, The lncRNA-protein interactions network (LPI) for the PAN RNA m6A methylome visualized by Cytoscape. Proteins that were found to associate with PAN RNA are shown in purple (writers), blue (readers), and green (erasers).

**
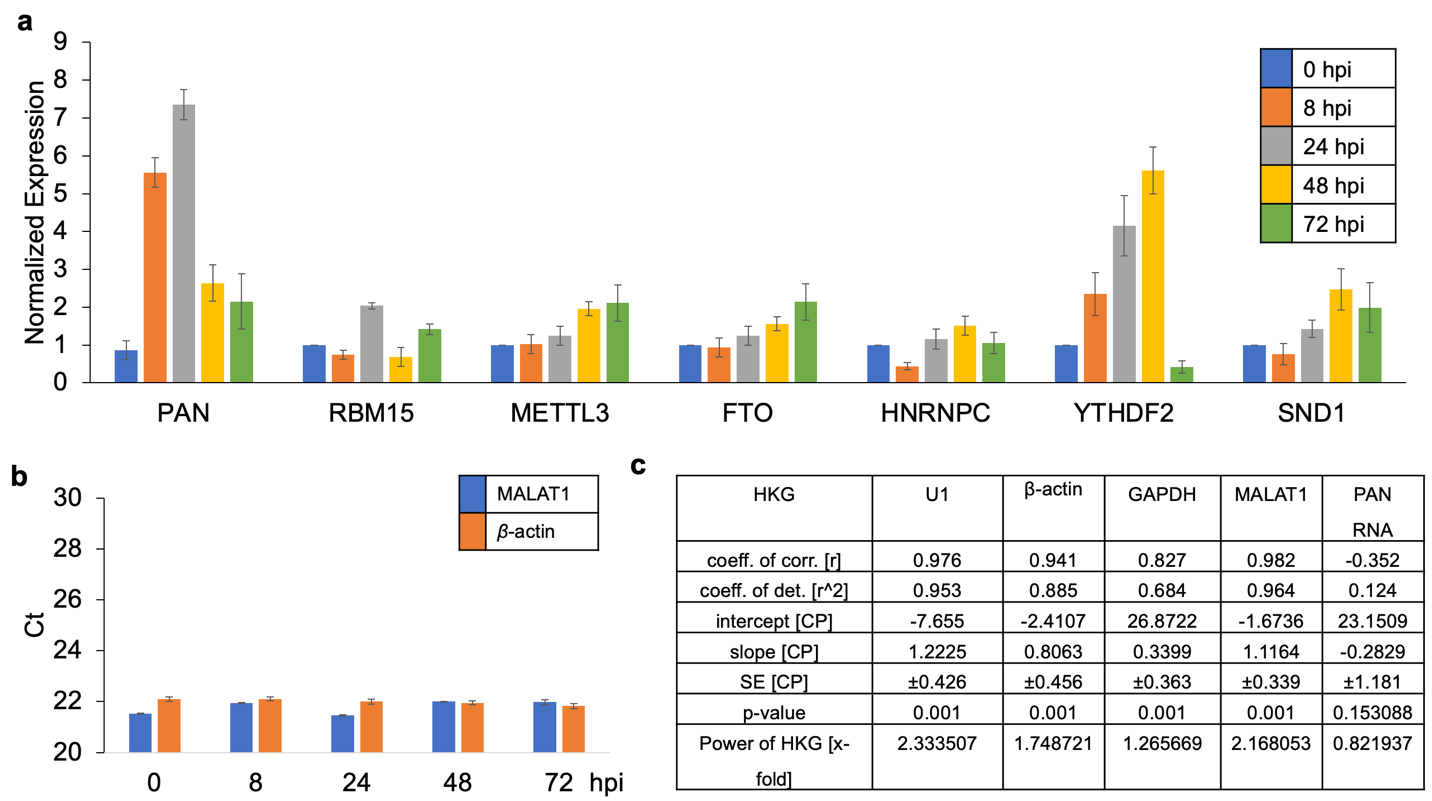
**

**Supplemental Fig. 7 a**,The normalized expression of methylome-associated mRNAs encoding RBM15, METTL3, FTO, HNRNPC, YTHDF2, SND1 during the latent and lytic stages of KSHV replication. **b,** The expression levels of MALAT1 and *β*-actin during uninduced (0 h pi), immediate early (8 h pi), early (24 h pi), and late lytic (48 – 72 h pi) stages of KSHV infection. All data normalization analysis were performed using MALAT1 and *β*-actin as they were determined in our and previous studies (Borah et al., 2002) to be not significantly affected by the progression of KSHV replication (n = 3). **c,** The results of pair-wise correlation and regression analyses performed by BestKeeper using housekeeping genes (HKG): U1 snRNA, β-actin, GAPDH, MALAT1 and PAN lncRNAs (outlier).

**
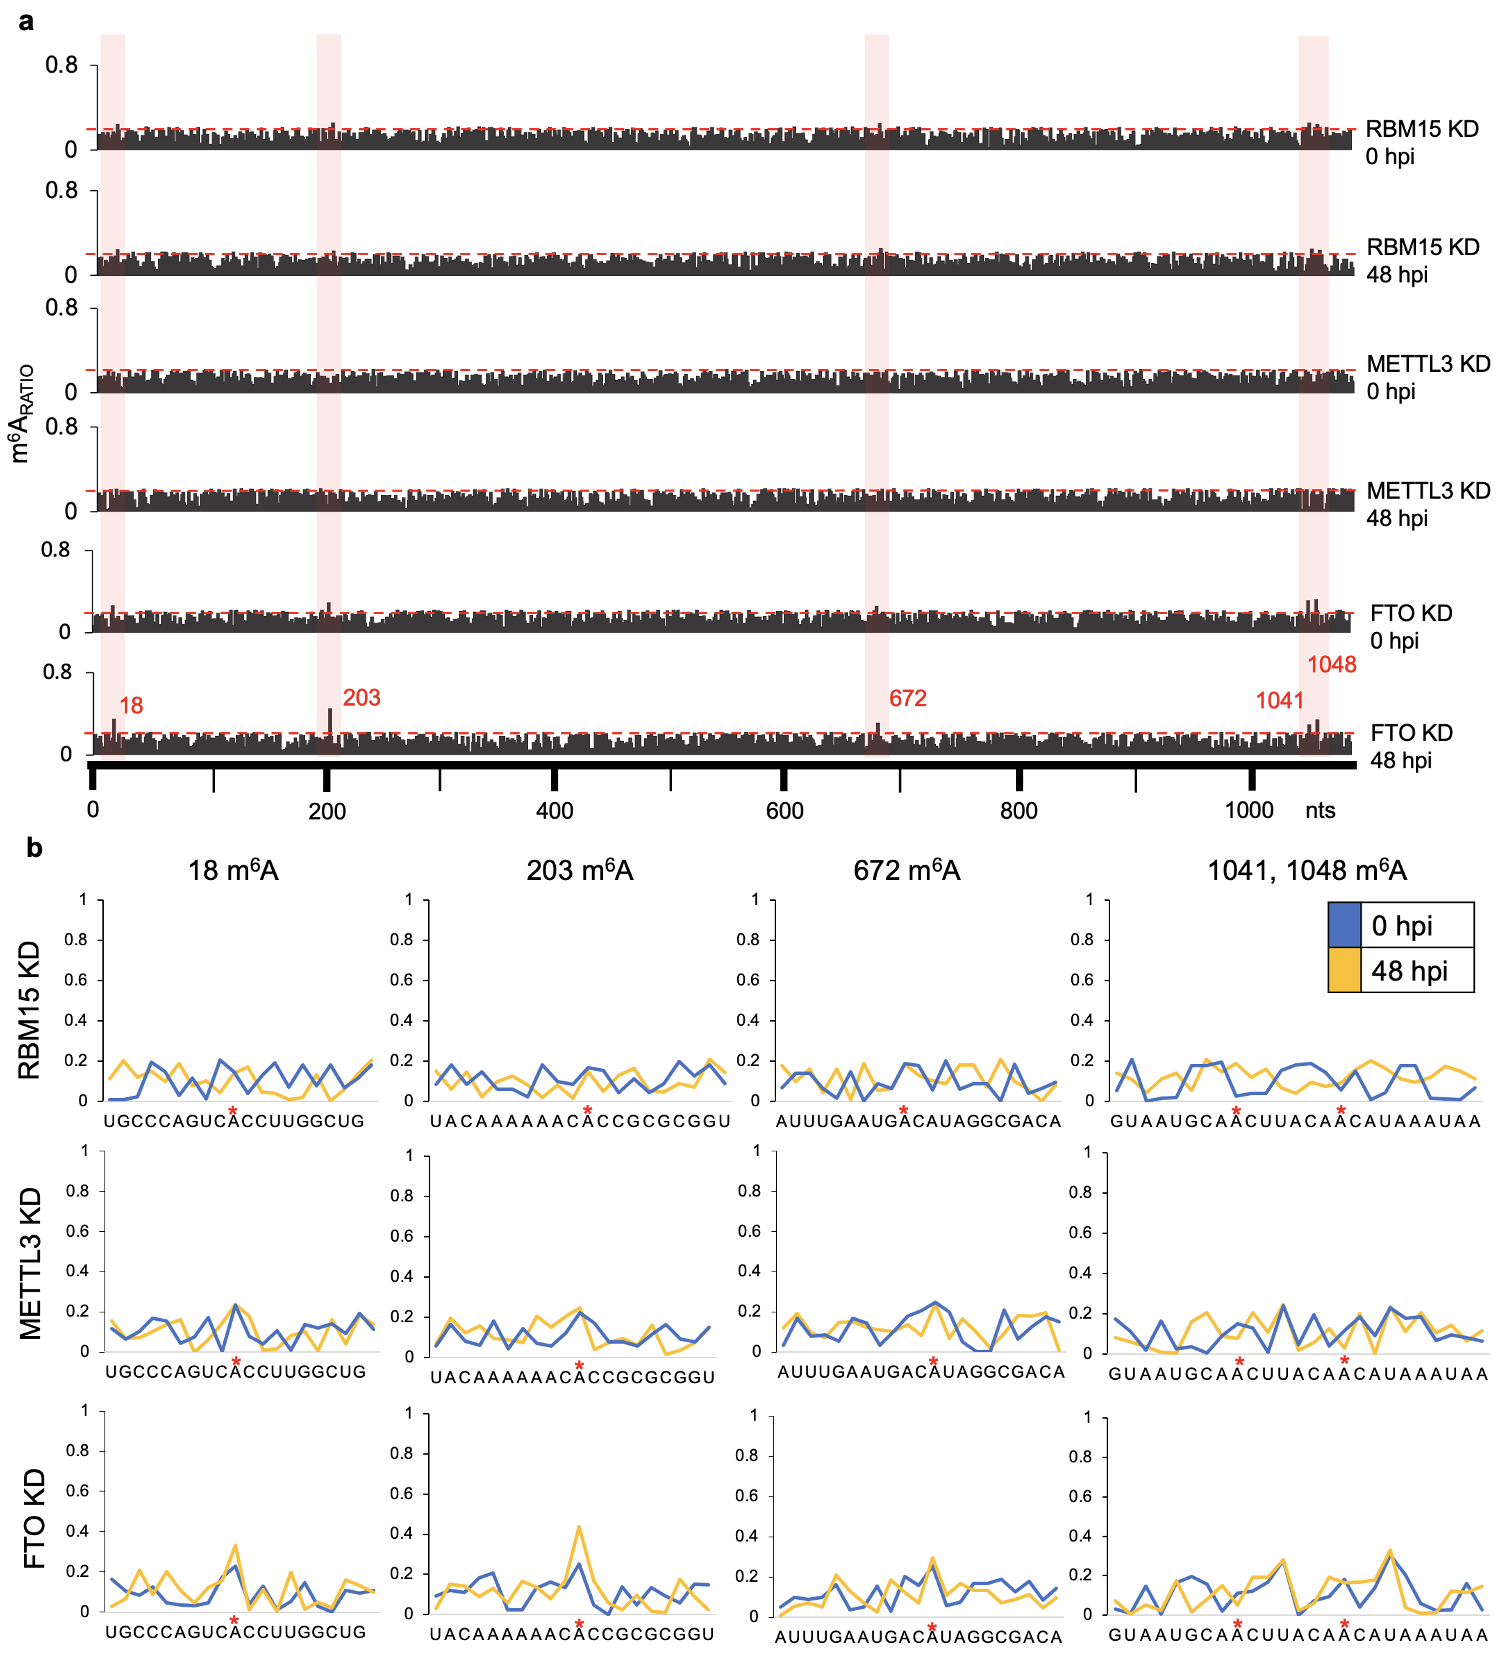
**

**Supplementary Fig. 8 a,** The graphs represent m6ARATIO (Y-axis) against PAN RNA sequence (X-axis). The peaks correspond to the expected RT stop 1 nt downstream of m6A. The threshold line (red) for calling m6A peaks is set at 0.2 and it was calculated by dividing the average m6ARATIO values calculated for all PAN nucleotides divided by the total number of nucleotides. **b,** The charts representing the signal-to-noise ratio for PAN sequence overlapping m6A within specified nucleotide window (X-axis) in BCBL-1 for RBM15, METTL3, and FTO knockdown (KD) cell lines. Time points of KSHV infection are color-coded as follows: uninduced stage - 0 h pi is indicated with blue line; late lytic stage – 48 h pi is indicated with yellow line.

**
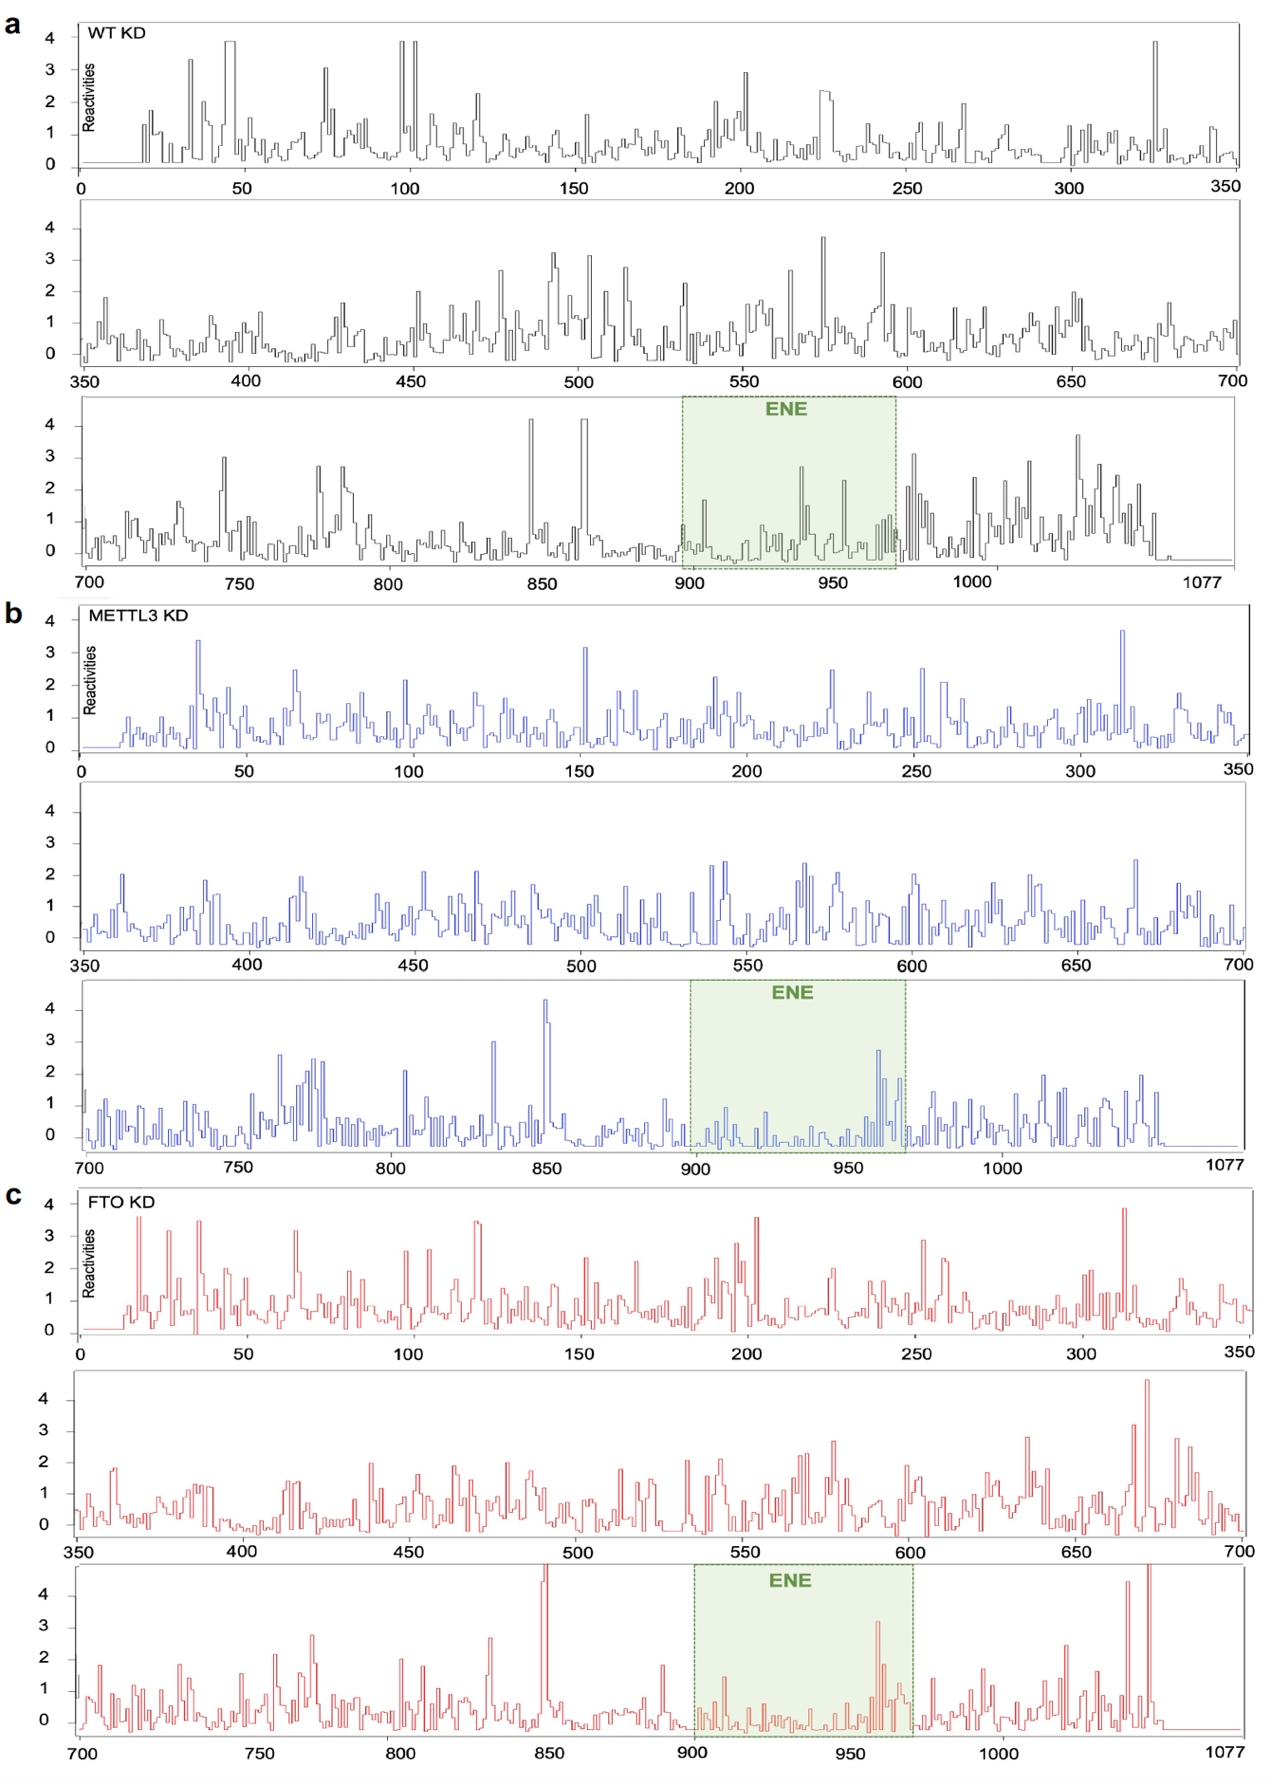
Supplementary Fig. 9** Step-plots representing SHAPE-MaP reactivity profiles for PAN RNA probed in **a,** wild-type, **b,** METTL3. **c,** FTO knockdown BCBL-1 cells. X- axis corresponds to PAN RNA nucleotide sequence, Y-axis represents SHAPE-MaP reactivity values. Nucleotides 1-14 and 1056-1077 were not covered in the analysis due to primer annealing. The position of the expression and nuclear retention (ENE) motif is indicated with green square.

**
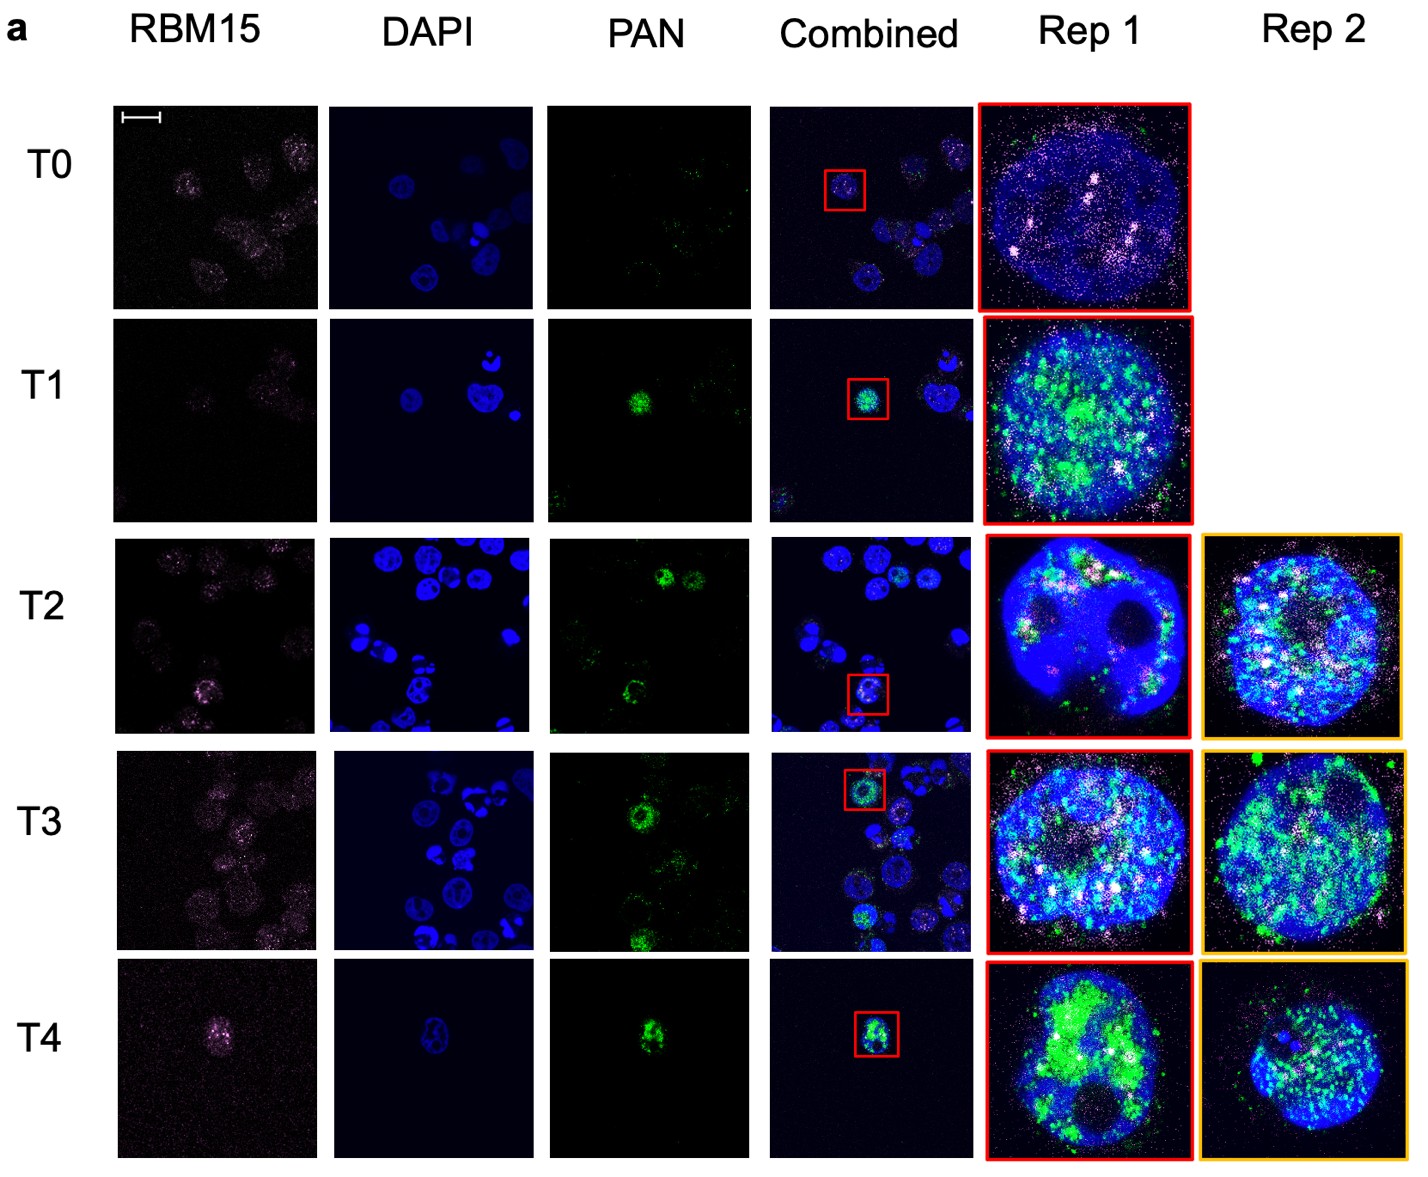
**

72 hpi

48 hpi

24 hpi

8 hpi

0 hpi

**
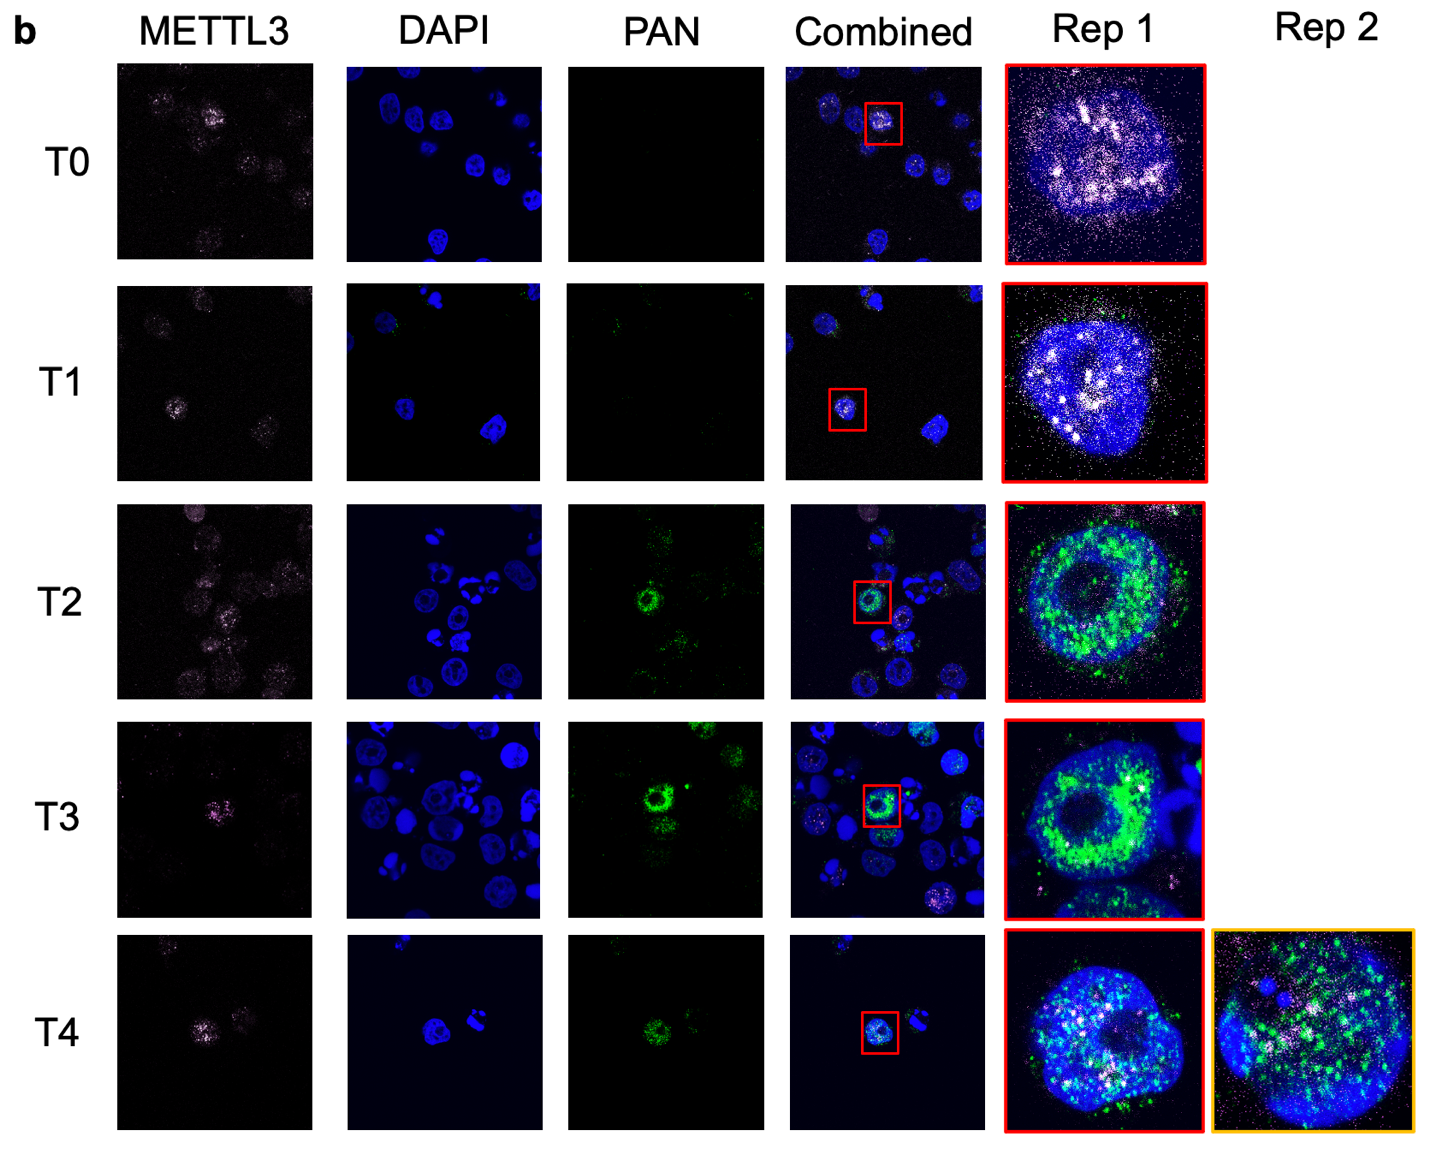
**

8 hpi

24 hpi

48 hpi

0 hpi

72 hpi

**
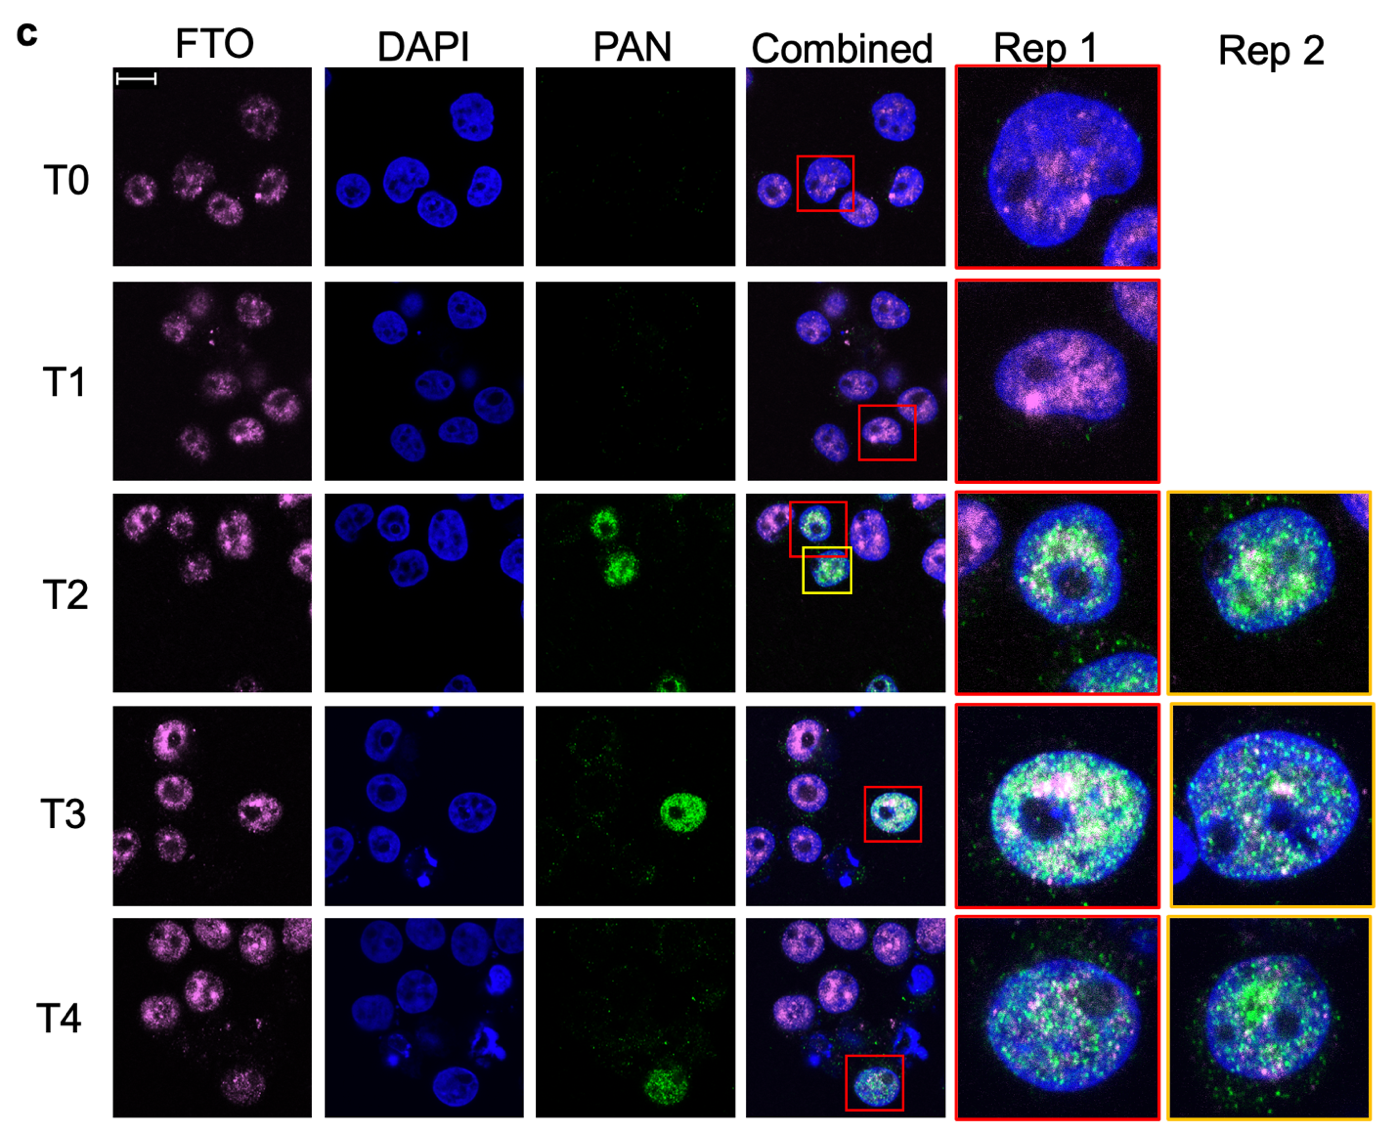
**

48 hpi

24 hpi

8 hpi

0 hpi

72 hpi

**
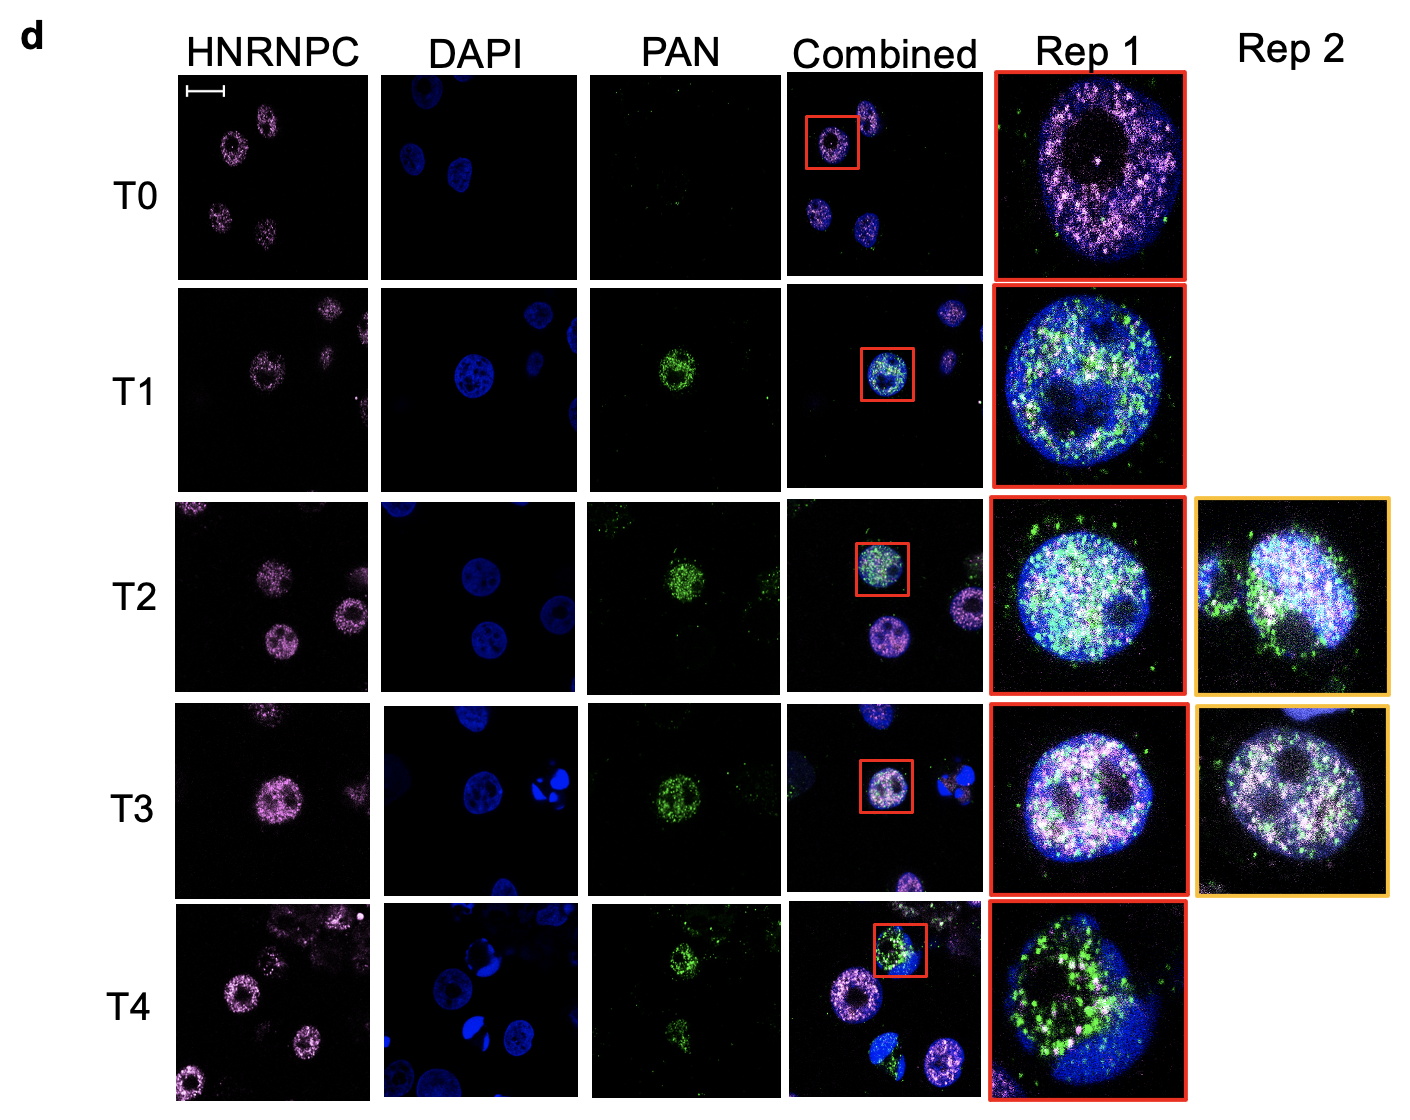
**

0 hpi

8 hpi

24 hpi

48 hpi

72 hpi

**
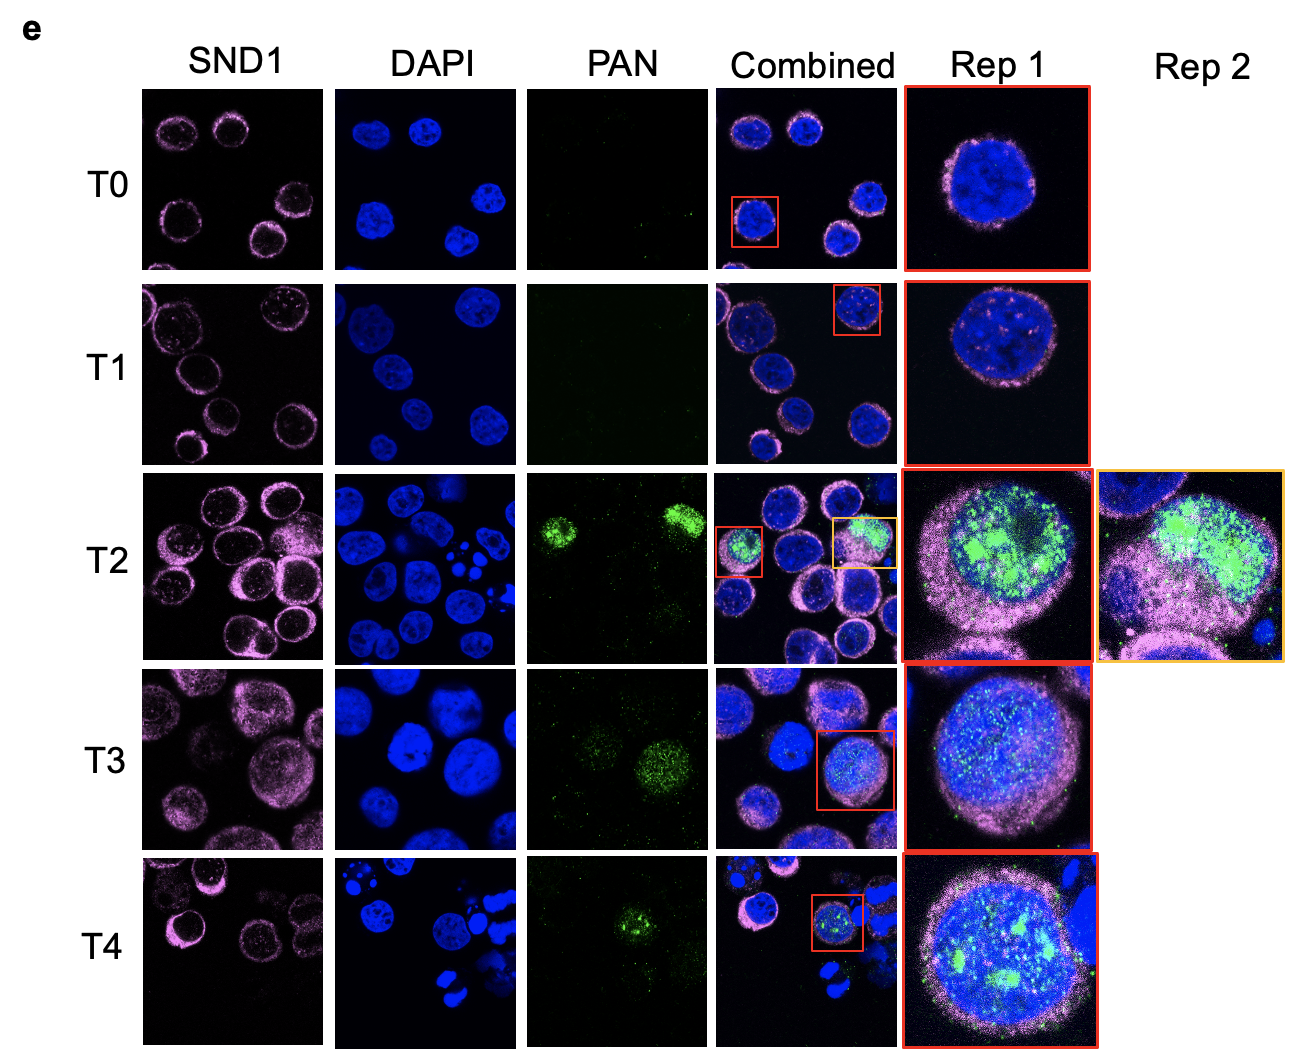
**

48 hpi

24 hpi

8 hpi

0 hpi

72 hpi

**
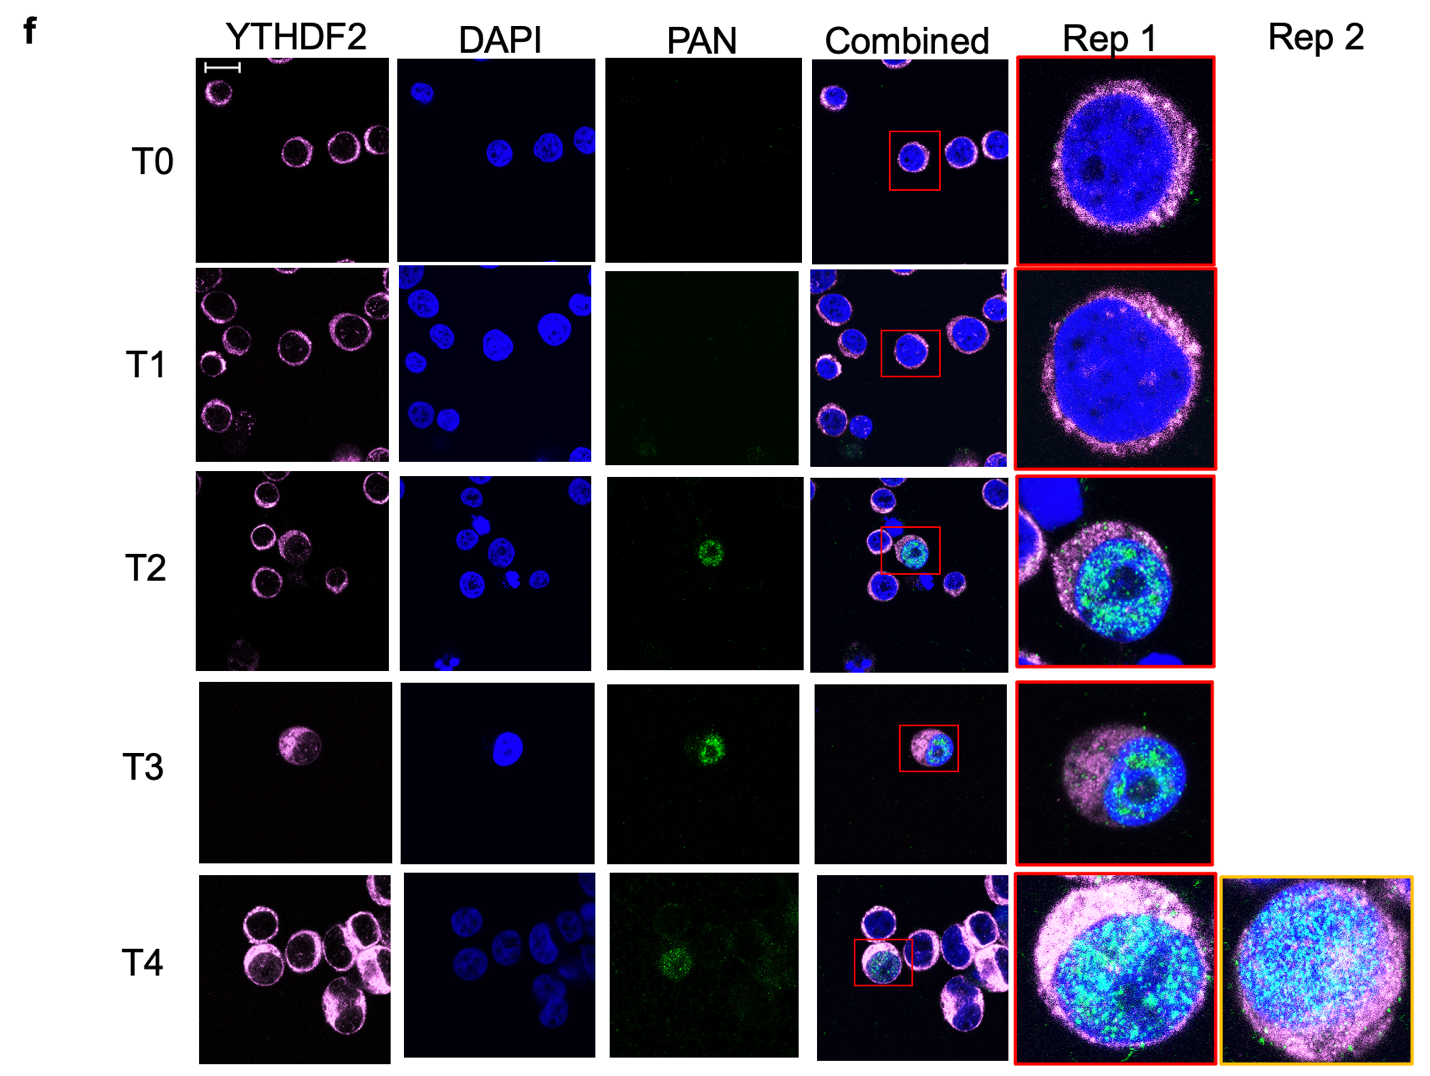
**

72 hpi

48 hpi

24 hpi

8 hpi

0 hpi

**Supplementary Fig. 10** Confocal fluorescent microscopy analysis of PAN and related m6A methylome components performed in BCBL-1 cells during the latent (0 hpi) and lytic (8-72 hpi stages of KSHV replication. The confocal microscopy micrographs representing the individual methylome enzymes (in pink) are ordered as follows: **a**, RBM15, **b**, METTL3, **c**, FTO, **d**, HNRNPC, **e**, SND1, and **f**, YTHDF2. DAPI staining of the nuclei is in blue, and PAN RNA is green.

**Supplementary Table 1. List of oligonucleotides used in this study.** The following abbreviations have been used to indicate specific to the sequences:5Biosg - 5’ biotinylation. 5Phos - 5’ phosphorylation. N - random nucleotides. 5Sp9 - triethylene glycol spacer. 3ddc - 3’ dideoxycytidine chain terminator, Fw – forward, Rv-reverse orientation. The bolded sequences indicate Illumina Tru-seq indexes.

| **Method** | **Primer** | **Sequence** |
| --- | --- | --- |
| PAN Affinity  Capture | Bio-LeftTagPrimer | /5’Biotin/ATGAGCCCCTTAACATGTGC |
| TAG1-Left | GGACGCTTGCTACACCGTAT |
| TAG2-Left | ATGAGCCCCTTAACATGTGC |
| T7RightTagPrimer (antisense probes to capture PAN-RNA) | GGATTCTAATACGACTCACTATAGGGATACGGTGTAGCAAGCGTCC |
| T7LeftTagPrimer (sense probes) | GGATTCTAATACGACTCACTATAGGGATGAGCCCCTTAACATGTGC |
| ProbeK7 primers Fw | ATGAGCCCCTTAACATGTGCGCTAAACTGACTCAAGCTGG |
| ProbeK7 primers Rv | ATACGGTGTAGCAAGCGTCCATGGGAACACTGGAGATAAAAG |
| Probe8 primers Fw | ATGAGCCCCTTAACATGTGCAGGGGGCTACAACTGGCCTG |
| Probe8 primers Rv | ATACGGTGTAGCAAGCGTCCCTCCATAAGCCCGCAGAAC |
| Probe9 primers Fw | ATGAGCCCCTTAACATGTGCTGCGGGCTTATGGAGAGCTC |
| Probe9 primers Rv | ATACGGTGTAGCAAGCGTCCCTTTTGGCAATATACCCATC |
| Probe10 primers Fw | ATGAGCCCCTTAACATGTGCGTATATTGCCAAAAGCGACG |
| Probe10 primers Rv | ATACGGTGTAGCAAGCGTCCCAGTCACCTTGGCTGCCGC |
| SHAPE-MaP Primers | PAN_RT1 | CATTATATTCCACATTCAGAC |
| PAN_RT2 | CCGCACACCACTTTAGTTC |
| PAN_RT3 | GGATTAAACATTGACCTTTATTTATG |
| PZ1, For | GACTGGAGTTCAGACGTGTGCTCTTCCGATCTNNNNNCCCAGTCACCTTGGCTGCCG |
| PZ2, For | GACTGGAGTTCAGACGTGTGCTCTTCCGATCTNNNNNCCTTGCGGGTTATTGCATTG |
| PZ3, For | GACTGGAGTTCAGACGTGTGCTCTTCCGATCTNNNNNGGCGACAAAGTGAGGTGG |
| PZ3, Rev | CCCTACACGACGCTCTTCCGATCTNNNNNGGATTAAACATTGACCTT |
| PZ2, Rev | CCCTACACGACGCTCTTCCGATCTNNNNNCTTACACGACTTTGAAAC |
| PZ1, Rev | CCCTACACGACGCTCTTCCGATCTNNNNNGTATCCTCGCATATCATAAA |
| P7,I-1 | CAAGCAGAAGACGGCATACGAGAT**CGTGAT**GTGACTGGAGTTCAGAC |
| P7, I-2 | CAAGCAGAAGACGGCATACGAGAT**ACATCG**GTGACTGGAGTTCAGAC |
| P7, I-3 | CAAGCAGAAGACGGCATACGAGAT**GCCTAA**GTGACTGGAGTTCAGAC |
| P7,I-4 | CAAGCAGAAGACGGCATACGAGAT**TGGTCA**GTGACTGGAGTTCAGAC |
| P7,I-5 | CAAGCAGAAGACGGCATACGAGAT**CACTGT**GTGACTGGAGTTCAGAC |
| P7, I-6 | CAAGCAGAAGACGGCATACGAGAT**ATTGGC**GTGACTGGAGTTCAGAC |
| P7,I-7 | CAAGCAGAAGACGGCATACGAGAT**GATCTG**GTGACTGGAGTTCAGAC |
| P7,I-8 | CAAGCAGAAGACGGCATACGAGAT**TCAAGT**GTGACTGGAGTTCAGAC |
| P7,I-9 | CAAGCAGAAGACGGCATACGAGAT**CTGATC**GTGACTGGAGTTCAGAC |
| P7,I-10 | CAAGCAGAAGACGGCATACGAGAT**AAGCTA**GTGACTGGAGTTCAGAC |
| P7,I-11 | CAAGCAGAAGACGGCATACGAGAT**GTAGCC**GTGACTGGAGTTCAGAC |
| P7,I-12 | CAAGCAGAAGACGGCATACGAGAT**TACAAG**GTGACTGGAGTTCAGAC |
| P7, I-20 | CAAGCAGAAGACGGCATACGAGAT**GGCCAC**GTGACTGGAGTTCAGAC |
| P7, I-21 | CAAGCAGAAGACGGCATACGAGAT**CGAAAC**GTGACTGGAGTTCAGAC |
| P7-I-22 | CAAGCAGAAGACGGCATACGAGAT**CGTACG**GTGACTGGAGTTCAGAC |
| P5 | AATGATACGGCGACCACCGAGATCTACACTCTTTCCCTACACGACGCTCTTCCG |
| qPCR primers | K7-qPCR-Fw  (KSHV; 28597-28918) | AAAAGCGACGCAATCAACCC |
| K7-qPCR-Rv | TGGAGATAAAAGGGGCCAGC |
| PAN-qPCR-Fw  (KSHV; 29489-29567) | ATAGGCGACAAAGTGAGGTGGCAT |
| PAN-qPCR-Rv | TAACATTGAAAGAGCGCTCCCAGC |
| β-actin Fw  (Human; 1027-1204) | ATTGCCGACAGGATGCAGA |
| β-actin Rv | GAGTACTTGCGCTCAGGAGGA |
| Malat1 Fw  (Human; 258-339) | GACGGAGGTTGAGATGAAGC |
| Malat1 Rv | AATCGGGGCTCTGTAGTCCT |
| RBM15_Fw  (Human; 2819-3017) | CGAGATAGGAAGCACCGGAC |
| RBM15_Rv | CAACCAGTTTTGCACGGACA |
| YTH_Fw  (Human; 785-1130) | CTGTTGGTAGCGGGTCCATT |
| YTH_Rv | TGTTGCCCTACTGATGCCTG |
| hnRNP-C_Fw  (Human; 135-597) | TCCCCTTCTTGTTTTCGGCT |
| hnRNP-C_Rv | ACGTTTCGAGGGCACTACAG |
| Library preparation | RiL-19 RNA adapter | /5Phos/rArGrArUrCrGrGrArArGrArGrCrGrUrCrGrUrG/3ddC/ |
| 3Tr3 DNA adapter | /5Phos/AGATCGGAAGAGCACACGTCTG/3ddC/ |
| AR17 primer for reverse transcription | ACACGACGCTCTTCCGA |
| Universal PCR primer | AATGATACGGCGACCACCGAGATCTACACTCTTTCCCTACACGACGCTCTTCCGATCT |
| Index with barcode 1 | CAAGCAGAAGACGGCATACGAGAT**GTGAATAT**GTGACTGGAGTTCAGACGTGTGCTCTTCCGATCT |
| Index with barcode 2 | CAAGCAGAAGACGGCATACGAGAT**ACAGGCGC**GTGACTGGAGTTCAGACGTGTGCTCTTCCGATCT |
| Index with barcode 3 | CAAGCAGAAGACGGCATACGAGAT**CATAGAGT**GTGACTGGAGTTCAGACGTGTGCTCTTCCGATCT |
| Index with barcode 4 | CAAGCAGAAGACGGCATACGAGAT**TGCGAGAC**GTGACTGGAGTTCAGACGTGTGCTCTTCCGATCT |
| Index with barcode 5 | CAAGCAGAAGACGGCATACGAGAT**TCTCTACT**GTGACTGGAGTTCAGACGTGTGCTCTTCCGATCT |
| Index with barcode 6 | CAAGCAGAAGACGGCATACGAGAT**CTCTCGTC**GTGACTGGAGTTCAGACGTGTGCTCTTCCGATCT |
| Index with barcode 7 | CAAGCAGAAGACGGCATACGAGAT**CCAAGTCT**GTGACTGGAGTTCAGACGTGTGCTCTTCCGATCT |
| Index with barcode 8 | CAAGCAGAAGACGGCATACGAGAT**TTGGACTC**GTGACTGGAGTTCAGACGTGTGCTCTTCCGATCT |
| Index with barcode 9 | CAAGCAGAAGACGGCATACGAGAT**GCAGAATT**GTGACTGGAGTTCAGACGTGTGCTCTTCCGATCT |
| Index with barcode 10 | CAAGCAGAAGACGGCATACGAGAT**ATGAGGCC**GTGACTGGAGTTCAGACGTGTGCTCTTCCGATCT |
| Index with barcode 11 | CAAGCAGAAGACGGCATACGAGAT**ACTAAGAT**GTGACTGGAGTTCAGACGTGTGCTCTTCCGATCT |
| Index with barcode 12 | CAAGCAGAAGACGGCATACGAGAT**GTCGGAGC**GTGACTGGAGTTCAGACGTGTGCTCTTCCGATCT |
| Index with barcode 13 | CAAGCAGAAGACGGCATACGAGAT**ATCACGAC**GTGACTGGAGTTCAGACGTGTGCTCTTCCGATCT |
| Index with barcode 14 | CAAGCAGAAGACGGCATACGAGAT**ATCACG**GTGACTGGAGTTCAGACGTGTGCTCTTCCGATCT |
| Index with barcode 15 | CAAGCAGAAGACGGCATACGAGAT**CGATGT**GTGACTGGAGTTCAGACGTGTGCTCTTCCGATCT |
| m6A Controls | m6A Short RNA | CCGCCAGCUUUGG/m6A/CUUUCCGUUUAGCCCGUCUCUCUCUCG |
| m6A Short RNA primer | AUCCCGUCUCUCUCUCG |
| m6A_T7_rev | TAATACGACTCACTATAGGGGAAGCCAAAATAACCACAC |
| m6A_for | TCTCAGGCCATGTGGGAAAAG |
| m6A_PAN_RNA | ACTGGGACTGCCC/m6A/GTCACCTTGGCTGCCGCTTCACCTATGGATTTTGTGCTCGCTGCTTGCCTTCTTGCCGCTTCTGGTTTTC/m6A/TTGGTGCCGCCGATT |
| The SLAP Primers | RT 18 | GACTGGGCAGTCCCAGT |
| Splint 18 | CCAGTCCATGGCCTTGGCTGC/3SpC3 |
| Adapter 18 | /5Sp9/CATGGAAGCGGCAAGAAGGCAAGCAG |
| RT 672 | ATGTTCTTACACGACTTTGAA |
| Splint 672 | AACATCATGGGTCGCCTATG/3SpC3 |
| Adapter 672 | /5Sp9/CATGGGGAAAAATAAACACACCATTA |
| RT 203 | TGGGCAAATCGCAGCTTTTGT |
| Splint 203 | GCCCACATGGCACCGCGCGG/3SpC3 |
| Adapter 203 | /5Sp9/CATGGAATGTGGGAAAAGTAGGACGG |
| Forward 203 | TCCGTCCTACTTTTCCCACATT |
| RT 1048/1041 | TATGGATTAAACATTGACCTT |
| Splint 1048 | CCATACATGGCATAAATA/3SpC3 |
| Adapter 1048/1041 | /5Sp9/CATGGTTAGTTTAATTTGAGCTCTAG |
| Splint 1041 | CCATACATGGCTTACAAC/3SpC3 |
| RT Control 14 | GGAAAAGTAGGACGGAAAACC |
| Splint Control 14 | TTTCCCATGGCTCTGGCTTT/3SpC3 |
| Adapter Control 14 | /5Sp9/CATGGACCCACAATCGGCGGCACCAA |
| Forward Control 14 | TTGGTGCCGCCGATTGTGGGTT |
| RT Control 83 | CCAAAAGCGACGCAATCAACC |
| Splint Control 83 | TTTGGCATGGTTGGTGCC/3SpC3 |
| Adapter Control 83 | /5Sp9/CATGGGAAAACAGAAG |
| Forward Control 83 | CTTCTGTTTTC |
|  | SB2 | ACAAATGCCACCTCACTTTGTCGC |
| PAN RNA oligonucleotide probes (confocal) | SB85 | CGCTGCTTTCCTTTCACATT |
|  | SB88 | GTGAAGCGGCAGCCAAGGTGACTGG |

**Supplementary Table 2.** Primary and secondary antibodies used in this study.

| **Primary antibody** | **Dilution for Western blot** | **Dilution for immunofluorescence analysis** | **Secondary antibody** |
| --- | --- | --- | --- |
| RBM15 Polyclonal (ThermoFisher, PA5-22067) | 1:1000 | 1:50 | goat anti-rabbit immunoglobulin conjugated to horseradish peroxidase (Enzo, ADI-SAB-300-J) |
|  |
| METTL3 (ThermoFisher, MA5-34248) | N/A | 1:50 |  |
| METTL3 (ThermoFisher, MA5-27527) | 1:1000 | N/A | goat anti-rabbit immunoglobulin conjugated to horseradish peroxidase (Enzo, ADI-SAB-300-J) |
|  |
| FTO (ThermoFisher, PA5-51074) | 1:1000 | 1:200 | goat anti-rabbit immunoglobulin conjugated to horseradish peroxidase (Enzo, ADI-SAB-300-J) |
| hnRNP-C (ThermoFisher, PA5-22280) | 1:1000 | 1:200 | goat anti-rabbit immunoglobulin conjugated to horseradish peroxidase (Enzo, ADI-SAB-300-J) |
|
| YTHDF2 (Cell Signaling Technologies, 80014) | 1:1000 | 1:50 | goat anti-rabbit immunoglobulin conjugated to horseradish peroxidase (Enzo, ADI-SAB-300-J) |
|  |
| SND1 (Protein Technologies,10760-1-AP) | 1:1000 | 1:200 | goat anti-rabbit immunoglobulin conjugated to horseradish peroxidase (Enzo, ADI-SAB-300-J) |
| Tubulin (ABCAM, Ab185224) | 1:1000 | N/A | goat anti-rabbit immunoglobulin conjugated to horseradish peroxidase (Enzo, ADI-SAB-300-J) |
|  |
| Actin - Mouse | 1:1000 | N/A | goat anti-mouse immunoglobulin conjugated to horseradish peroxidase (Abcam, ab97023) |
|

**REFERENCES:**

1. Ni,W., Yao,S., Zhou,Y., Liu,Y., Huang,P., Zhou,A., Liu,J., Che,L. and Li,J. (2019) Long noncoding RNA GAS5 inhibits progression of colorectal cancer by interacting with and triggering YAP phosphorylation and degradation and is negatively regulated by the m6A reader YTHDF3. *Mol. Cancer*, **18**.

2. Porman,A.M., Roberts,J.T., Chrupcala,M., Kennedy,M., Williams,M.M., Richer,J.K. and Johnson,A.M. (2020) A single N6-methyladenosine site in lncRNA HOTAIR regulates its function in breast cancer cells. *bioRxiv*, **1**, 2020.06.08.140954.

3. Wang,X., Liu,C., Zhang,S., Yan,H., Zhang,L., Jiang,A., Liu,Y., Feng,Y., Li,D., Guo,Y., *et al.* (2021) N6-methyladenosine modification of MALAT1 promotes metastasis via reshaping nuclear speckles. *Dev. Cell*, **56**, 702-715.e8.

4. Zhou,K.I., Parisien,M., Dai,Q., Liu,N., Diatchenko,L., Sachleben,J.R. and Pan,T. (2016) N6-Methyladenosine Modification in a Long Noncoding RNA Hairpin Predisposes Its Conformation to Protein Binding. *J. Mol. Biol.*, **428**, 822–833.

5. Patil,D.P., Chen,C.K., Pickering,B.F., Chow,A., Jackson,C., Guttman,M. and Jaffrey,S.R. (2016) M6 A RNA methylation promotes XIST-mediated transcriptional repression. *Nature*, **537**, 369–373.
